# Supplementary material
Source: PubMed Central journal article supplement (PMC10111232)
Supplement: jamaneurol-e230697-s002.pdf [file jamaneurol-e230697-s002.pdf]

## Data Sharing Statement

Moran. Glycemic Control Over Multiple Decades and Dementia Risk in People With Type 2 Diabetes. *JAMA Neurol.* Published April 17, 2023. doi:10.1001/jamaneurol.2023.0697

### Data

**Data available:** No

### Additional Information

**Explanation for why data not available:** De-identified data are available to qualified investigators from the KPNC IRB Institutional Data Access/Ethics Committee for the purposes of replicating procedures and results.
